# Supplementary material
Source: Springer Nature journal article supplement (https://www.springermedizin.de/resource/supplementary/12958_2014_1276_MOESM3_ESM.pdf/9566956)
Supplement: MOESM3 [file 9566956]

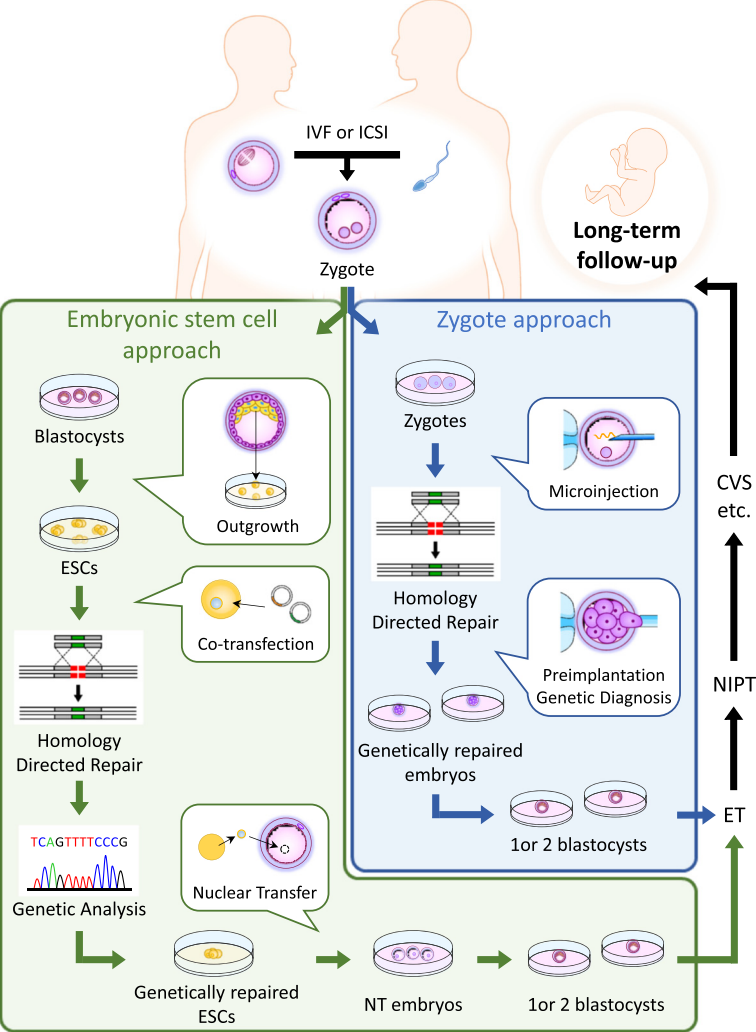

IVF or ICSI

Zygote

Long-term follow-up

Embryonic stem cell approach

Blastocysts

Outgrowth

ESCs

Co-transfection

Homology Directed Repair

Genetic Analysis

Nuclear Transfer

Genetically repaired ESCs

NT embryos

1 or 2 blastocysts

Zygote approach

Zygotes

Microinjection

Homology Directed Repair

Preimplantation Genetic Diagnosis

Genetically repaired embryos

1 or 2 blastocysts

CVS etc.

NIPT

ET
